# Supplementary material for: New technique for high-precision, simultaneous measurements ofCH 4 , N 2 O and CO 2 concentrations, isotopic and elemental ratios of N 2 ,O 2 and Ar, and total air content in ice cores by wet extraction
Source: Copernicus journal article supplement (doi:10.5194/amt-2020-171), 2020-06-09
Supplement: Supplementary file 1 [file Oyabu et al._Dome Fuji and NEEM ice cores, Gas data.xlsx]

## Sheet: Dome Fuji
Dome Fuji ice core, gas data
CORRESPONDENCE TO: Ikumi Oyabu, National Institute of Polar Research (oyabu.ikumi@nipr.ac.jp)
Please cite the original reference when using this data:
Original reference: Oyabu et al. New technique for high-precision, simultaneous measurements of CH4, N2O and CO2 concentrations, isotopic and elemental ratios of N2, O2 and Ar, and total air content in ice cores by wet extraction
Reference for gas age WDC05A: Mitchell, L. et al. (2013). Constraints on the Late Holocene Anthropogenic Contribution to the Atmospheric Methane Budget. Science, 342(6161), 964–966. http://doi.org/10.1126/science.1238920
Reference for gas age DFO-2006: Kawamura, K. et al. (2007). Northern Hemisphere forcing of climatic cycles in Antarctica over the past 360,000years. Nature, 448(7), 912–916. http://doi.org/10.1038/nature06015
Dome Fuji ice core, gas data for the last 2000 yr (used for Fig. 9, Fig. 10, Fig. A1)
Note: CH4, CO2 and N2O are gravitationally corrected using d15N of the same samples
							Mean values of replicate measurements												First measurements													Second measurements (if applicable)
Dome Fuji Sample ID	top (m)	bottom (m)	center (m)	Gas age at center depth (cync. to WDC05A)	No. of meas. for GHGs	No. of meas. for isotopes	TAC (mlSTP kg-1)	CH4 grav.corr. (ppb)	CO2 grav.corr. (ppm)	N2O grav.corr. (ppb)	15N (‰)	18O (‰)	O2/N2 (‰)	ArN2 (‰)	18O grav.corr. (‰)	O2N2 grav.corr (‰)	ArN2 grav.corr. (‰)		Extraction date	Surface removal thickness (mm)	TAC (mlSTP kg-1)	CH4 grav.corr. (ppb)	CO2 grav.corr. (ppm)	N2O grav.corr. (ppb)	15N (‰)	18O (‰)	O2/N2 (‰)	ArN2 (‰)	18O grav.corr (‰)	O2N2 grav.corr. (‰)	ArN2 grav.corr. (‰)	Extraction date	Surface removal thickness (mm)	TAC (mlSTP kg-1)	CH4 grav.corr. (ppb)	CO2 grav.corr. (ppm)	N2O grav.corr. (ppb)	15N (‰)	18O (‰)	O2/N2 (‰)	ArN2 (‰)	18O grav.corr (‰)	O2N2 grav.corr. (‰)	ArN2 grav.corr. (‰)
01-001	112.88	113.09	112.985	1663.66	1	1	68.6292	697.589	281.198	270.068	0.534444	1.08725	-10.6246	-0.113934	0.0183633	-12.7624	-6.52727		2016-11-10	5	68.6292	697.589	281.198	270.068	0.534444	1.08725	-10.6246	-0.113934	0.0183633	-12.7624	-6.52727
01-003	113.59	113.71	113.65	1643.15	2	2	70.2942	689.355	280.853	265.52	0.499224	1.05159	-14.0385	-1.81194	0.0531429	-16.0354	-7.80263		2016-09-13	3	71.2511	689.584	278.221	265.378	0.497412	1.0473	-13.8046	-1.66559	0.0524774	-15.7943	-7.63454	2016-09-13	3	69.3373	689.126	283.486	265.662	0.501035	1.05588	-14.2724	-1.95829	0.0538084	-16.2766	-7.97071
01-006	115.09	115.21	115.15	1596.52	1	1	74.7235	689.066	280.076	265.319	0.522248	1.07755	-11.4224	-0.439854	0.0330535	-13.5114	-6.70683		2016-12-07	10	74.7235	689.066	280.076	265.319	0.522248	1.07755	-11.4224	-0.439854	0.0330535	-13.5114	-6.70683
01-010	118.605	118.79	118.698	1486.17	1	1	73.3823	691.058	286.834	267.262	0.514022	1.07584	-11.587	-0.729828	0.0477985	-13.6431	-6.89809		2016-11-08	5	73.3823	691.058	286.834	267.262	0.514022	1.07584	-11.587	-0.729828	0.0477985	-13.6431	-6.89809
01-011	118.605	119.29	119.23	1469.7	1	1	77.9437	680.683	282.576	266.339	0.517195	1.08298	-7.74084	1.38418	0.0485922	-9.80962	-4.82216		2018-10-19	9	77.9437	680.683	282.576	266.339	0.517195	1.08298	-7.74084	1.38418	0.0485922	-9.80962	-4.82216
01-014	118.605	120.78	120.68	1409.98	1	1	73.1627	682.691	298.088	273.184	0.51588	1.06821	-11.3096	-0.747709	0.0364503	-13.3731	-6.93826		2016-11-09	5	73.1627	682.691	298.088	273.184	0.51588	1.06821	-11.3096	-0.747709	0.0364503	-13.3731	-6.93826
01-015	118.605	120.9	120.84	1403.35	1	1	82.74	681.477	281.818	269.363	0.508127	1.03328	-3.72629	2.97276	0.0170252	-5.7588	-3.12477		2018-06-19	7	82.74	681.477	281.818	269.363	0.508127	1.03328	-3.72629	2.97276	0.0170252	-5.7588	-3.12477
01-017	118.605	122.28	122.22	1343.65	2	2	75.4838	683.424	286.739	266.905	0.513812	1.06913	-9.26286	0.269596	0.0415041	-11.3181	-5.89615		2018-09-26	9	75.2532	688.278	286.386	267.659	0.51472	1.08025	-9.32954	0.262862	0.0508042	-11.3884	-5.91378	2018-09-26	9	75.7144	678.57	287.092	266.151	0.512903	1.05801	-9.19617	0.276329	0.032204	-11.2478	-5.87851
01-020	118.605	123.4	123.34	1295.2	2	2	75.0564	681.947	302.23	270.953	0.528523	1.08906	-11.1054	-0.587386	0.0320131	-13.2195	-6.92966		2016-10-20	8	75.2643	684.445	300.23	271.254	0.520311	1.07567	-11.1218	-0.606569	0.035053	-13.203	-6.8503	2016-10-20	8	74.8485	679.449	304.23	270.652	0.536735	1.10244	-11.0891	-0.568203	0.0289731	-13.236	-7.00902
01-023	118.605	125.28	125.165	1216.03	1	1	72.6946	683.55	284.926	267.53	0.525595	1.08101	-11.0866	-0.602613	0.0298258	-13.189	-6.90975		2016-11-10	5	72.6946	683.55	284.926	267.53	0.525595	1.08101	-11.0866	-0.602613	0.0298258	-13.189	-6.90975
01-026	118.605	126.76	126.7	1149.43	2	2	74.7458	681.473	290.612	267.126	0.516141	1.07762	-11.7387	-0.601087	0.0453388	-13.8033	-6.79479		2018-09-26	9	75.103	684.374	294.729	268.286	0.506968	1.05943	-11.3961	-0.590937	0.0454884	-13.424	-6.67456	2018-09-26	9	74.3886	678.572	286.495	265.965	0.525315	1.09582	-12.0813	-0.611238	0.0451892	-14.1826	-6.91501
01-027	118.605	127.23	127.162	1128.96	1	1	77.6347	683.681	288.556	271.595	0.52771	1.07703	-7.79603	1.12252	0.0216125	-9.90687	-5.20999		2016-11-11	4	77.6347	683.681	288.556	271.595	0.52771	1.07703	-7.79603	1.12252	0.0216125	-9.90687	-5.20999
01-029	118.605	127.85	127.79	1100.93	1	1	78.3116	683.139	291.102	267.51	0.51113	1.05817	-8.91033	0.504485	0.0359077	-10.9548	-5.62907		2018-10-16	9	78.3116	683.139	291.102	267.51	0.51113	1.05817	-8.91033	0.504485	0.0359077	-10.9548	-5.62907
01-031	118.605	129.23	129.157	1039.97	1	1	74.6562	680.983	288.459	285.187	0.525868	1.0868	-10.1174	0.22091	0.0350672	-12.2208	-6.0895		2016-08-24	3	74.6562	680.983	288.459	285.187	0.525868	1.0868	-10.1174	0.22091	0.0350672	-12.2208	-6.0895
01-032	118.605	129.73	129.67	1017.28	1	1	79.223	679.683	286.402	269.279	0.530123	1.0892	-9.11842	0.225332	0.0289517	-11.2389	-6.13614		2018-10-26	9	79.223	679.683	286.402	269.279	0.530123	1.0892	-9.11842	0.225332	0.0289517	-11.2389	-6.13614
01-034	118.605	130.73	130.657	973.232	1	1	74.3684	672.857	282.136	266.853	0.532425	1.1114	-9.65599	0.137617	0.0465456	-11.7857	-6.25148		2016-12-07	4	74.3684	672.857	282.136	266.853	0.532425	1.1114	-9.65599	0.137617	0.0465456	-11.7857	-6.25148
01-036	118.605	131.35	131.29	945.2	1	1	80.1981	661.49	289.298	265.611	0.518449	1.07513	-10.0628	0.236408	0.0382294	-12.1366	-5.98498		2018-10-24	9	80.1981	661.49	289.298	265.611	0.518449	1.07513	-10.0628	0.236408	0.0382294	-12.1366	-5.98498
01-039	118.605	132.85	132.79	863.82	1	1	79.0319	662.441	282.432	264.003	0.511062	1.06896	-9.0324	0.396446	0.0468402	-11.0766	-5.73629		2018-12-21	12	79.0319	662.441	282.432	264.003	0.511062	1.06896	-9.0324	0.396446	0.0468402	-11.0766	-5.73629
01-040	118.605	133.73	133.62	819.241	1	1	77.5495	653.035	289.434	267.279	0.502389	1.0657	-9.96912	0.248513	0.0609257	-11.9787	-5.78016		2016-11-09	5	77.5495	653.035	289.434	267.279	0.502389	1.0657	-9.96912	0.248513	0.0609257	-11.9787	-5.78016
01-041	118.605	134.23	134.17	789.7	1	1	79.5271	647.959	285.183	264.403	0.521641	1.05465	-7.45658	1.09949	0.0113703	-9.54314	-5.16019		2018-12-18	12	79.5271	647.959	285.183	264.403	0.521641	1.05465	-7.45658	1.09949	0.0113703	-9.54314	-5.16019
01-043	118.605	135.26	135.2	763.312	1	1	77.0914	653.396	283.053	271.539	0.51839	1.09595	-12.1738	-0.701598	0.0591738	-14.2474	-6.92228		2016-08-24	3	77.0914	653.396	283.053	271.539	0.51839	1.09595	-12.1738	-0.701598	0.0591738	-14.2474	-6.92228
01-044	118.605	135.38	135.32	760.167	1	1	81.5115	652.793	280.13	265.652	0.517131	1.05428	-7.25825	1.18635	0.020021	-9.32678	-5.01922		2018-12-21	10	81.5115	652.793	280.13	265.652	0.517131	1.05428	-7.25825	1.18635	0.020021	-9.32678	-5.01922
01-046	118.605	136.4	136.34	733.436	1	1	78.8163	649.904	277.602	269.935	0.532098	1.11062	-10.7633	-0.267208	0.0464243	-12.8917	-6.65238		2016-12-08	8	78.8163	649.904	277.602	269.935	0.532098	1.11062	-10.7633	-0.267208	0.0464243	-12.8917	-6.65238
01-049	118.605	137.9	137.84	694.126	2	2	78.3183	642.876	280.164	264.354	0.520222	1.08048	-11.2527	-0.203433	0.0400348	-13.3336	-6.4461		2018-02-09	3	77.979	641.076	280.051	264.475	0.52216	1.08213	-11.3469	-0.222356	0.0378072	-13.4355	-6.48828	2018-02-09	3	78.6576	644.675	280.276	264.233	0.518285	1.07883	-11.1586	-0.184509	0.0422624	-13.2317	-6.40393
01-050	118.605	138.82	138.72	671.064	1	1	78.4487	646.27	289.346	267.048	0.519978	1.08393	-8.85694	0.681948	0.0439748	-10.9369	-5.55778		2016-11-10	5	78.4487	646.27	289.346	267.048	0.519978	1.08393	-8.85694	0.681948	0.0439748	-10.9369	-5.55778
01-052	118.605	139.44	139.38	653.768	1	1	79.7787	642.125	289.755	266.578	0.521845	1.07255	-9.1954	0.311604	0.0288594	-11.2828	-5.95053		2018-10-10	9	79.7787	642.125	289.755	266.578	0.521845	1.07255	-9.1954	0.311604	0.0288594	-11.2828	-5.95053
01-053	118.605	140.32	140.26	630.706	1	1	78.7774	646.131	287.598	265.551	0.536355	1.09402	-9.10653	0.429398	0.0213079	-11.2519	-6.00686		2016-10-17	5	78.7774	646.131	287.598	265.551	0.536355	1.09402	-9.10653	0.429398	0.0213079	-11.2519	-6.00686
01-055	118.605	140.94	140.88	614.458	1	1	79.6436	640.664	283.585	265.759	0.53058	1.07841	-9.04741	0.151388	0.0172539	-11.1697	-6.21557		2018-12-18	10	79.6436	640.664	283.585	265.759	0.53058	1.07841	-9.04741	0.151388	0.0172539	-11.1697	-6.21557
01-057	118.605	142.32	142.26	575.776	1	1	80.8507	651.443	282.817	264.289	0.528786	1.08561	-9.31165	0.145499	0.0280358	-11.4268	-6.19993		2018-12-19	12	80.8507	651.443	282.817	264.289	0.528786	1.08561	-9.31165	0.145499	0.0280358	-11.4268	-6.19993
01-058	118.605	142.82	142.712	563.706	1	1	78.7763	645.17	287.861	265.146	0.535958	1.11759	-8.2137	1.14308	0.0456783	-10.3575	-5.28841		2016-11-10	6	78.7763	645.17	287.861	265.146	0.535958	1.11759	-8.2137	1.14308	0.0456783	-10.3575	-5.28841
01-059	118.605	142.94	142.88	559.328	1	1	80.0155	645.675	281.27	265.044	0.520136	1.07519	-9.7166	0.00571716	0.0349155	-11.7971	-6.23591		2018-12-19	12	80.0155	645.675	281.27	265.044	0.520136	1.07519	-9.7166	0.00571716	0.0349155	-11.7971	-6.23591
01-062	118.605	144.68	144.603	515.028	2	1	78.2028	650.039	289.888	264.535	0.503501	1.06912	-10.9401	-0.613258	0.0621141	-12.9541	-6.65526		2016-11-01	8	78.2028	650.039	289.888	264.535	0.540298	1.12259	-11.2765	-0.654117	0.0419926	-13.4377	-7.13769	2016-10-25	8					0.466703	1.01564	-10.6036	-0.572398	0.0822357	-12.4704	-6.17283
01-064	118.605	145.77	145.67	487.47	1	1	80.4679	640.235	282.166	265.635	0.520498	1.09418	-8.22693	0.995121	0.0531801	-10.3089	-5.25086		2016-11-18	8	80.4679	640.235	282.166	265.635	0.520498	1.09418	-8.22693	0.995121	0.0531801	-10.3089	-5.25086
01-065	118.605	145.89	145.83	483.349	2	2	79.0007	642.758	280.574	267.99	0.514328	1.09901	-11.3473	-0.411494	0.0703561	-13.4046	-6.58344		2017-02-08	6	78.5822	643.271	280.854	268.421	0.519103	1.11499	-11.2514	-0.349006	0.0767876	-13.3278	-6.57825	2017-02-08	6	79.4191	642.245	280.293	267.558	0.509553	1.08303	-11.4432	-0.473982	0.0639247	-13.4814	-6.58862
01-068	118.605	147.39	147.33	443.396	1	1	80.877	637.139	280.144	262.066	0.513581	1.06453	-9.27341	0.0487724	0.0373628	-11.3277	-6.11421		2018-12-21	12	80.877	637.139	280.144	262.066	0.513581	1.06453	-9.27341	0.0487724	0.0373628	-11.3277	-6.11421
01-070	118.605	148.72	148.65	408.1	1	1	77.92	635.883	287.183	266.315	0.527834	1.109	-11.413	-0.51365	0.053327	-13.5244	-6.84766		2016-08-24	3	77.92	635.883	287.183	266.315	0.527834	1.109	-11.413	-0.51365	0.053327	-13.5244	-6.84766
01-072	118.605	149.72	149.66	366.112	1	1	81.8666	642.09	283.543	266.453	0.50928	1.04609	-9.03709	0.354231	0.027526	-11.0742	-5.75713		2018-12-14	12	81.8666	642.09	283.543	266.453	0.50928	1.04609	-9.03709	0.354231	0.027526	-11.0742	-5.75713
01-075	118.605	150.925	150.851	316.64	1	1	81.3606	636.527	303.605	270.612	0.534887	1.1079	-8.36288	0.777341	0.0381228	-10.5024	-5.64131		2016-10-20	8	81.3606	636.527	303.605	270.612	0.534887	1.1079	-8.36288	0.777341	0.0381228	-10.5024	-5.64131
01-084	118.605	155.34	155.28	131.984	2	2	79.6459	635.027	295.045	270.857	0.531639	1.10458	-10.4528	-0.214915	0.0413049	-12.5794	-6.59459		2016-10-20	8	80.0634	634.815	297.034	272.886	0.54394	1.12472	-10.3669	-0.041972	0.0368402	-12.5427	-6.56925	2016-10-20	8	79.2284	635.24	293.057	268.829	0.519339	1.08445	-10.5387	-0.387859	0.0457695	-12.6161	-6.61992
01-089	118.605	157.81	157.75	36.209	2	2	83.1753	617.508	282.307	270.877	0.526081	1.08528	-8.70792	0.834111	0.0331152	-10.8122	-5.47886		2016-06-08	3	83.524	617.621	279.445	270.453	0.527452	1.08403	-8.84768	0.820349	0.0291232	-10.9575	-5.50907	2016-06-08	3	82.8266	617.395	285.169	271.3	0.52471	1.08653	-8.56817	0.847873	0.0371071	-10.667	-5.44865
Dome Fuji ice core, gas data (used for Fig. 8, Fig. 12, Fig. 13, Fig. 14, Fig. 15)
Dome Fuji core, CH4, CO2 and N2O are gravitationally corrected
							Mean values of replicate measurements												First measurements													Second measurements (if applicable)
Dome Fuji Sample ID	top (m)	bottom (m)	center (m)	Gas age at center depth (DFO-2006)	No. of meas. for GHGs	No. of meas. for isotopes	TAC (mlSTP kg-1)	CH4 grav.corr. (ppb)	CO2 grav.corr. (ppm)	N2O grav.corr. (ppb)	15N (‰)	18O (‰)	O2/N2 (‰)	ArN2 (‰)	18O grav.corr. (‰)	O2N2 grav.corr (‰)	ArN2 grav.corr. (‰)		Extraction date	Surface removal thickness (mm)	TAC (mlSTP kg-1)	CH4 grav.corr. (ppb)	CO2 grav.corr. (ppm)	N2O grav.corr. (ppb)	15N (‰)	18O (‰)	O2/N2 (‰)	ArN2 (‰)	18O grav.corr (‰)	O2N2 grav.corr. (‰)	ArN2 grav.corr. (‰)	Extraction date	Surface removal thickness (mm)	TAC (mlSTP kg-1)	CH4 grav.corr. (ppb)	CO2 grav.corr. (ppm)	N2O grav.corr. (ppb)	15N (‰)	18O (‰)	O2/N2 (‰)	ArN2 (‰)	18O grav.corr (‰)	O2N2 grav.corr. (‰)	ArN2 grav.corr. (‰)
03-036	317.9	318.02	317.96	8215.2	2	1	83.2513	621.141	277.545	262.398	0.530634	0.842632	-9.35488	0.491249	-0.218636	-11.4774	-5.87636		2017-01-06	13	83.562	621.694	287.098	258.91	0.530634	0.842632	-9.35488	0.491249	-0.218636	-11.4774	-5.87636	2019-07-10	(outer ice)	82.9407	620.587	267.993	265.886
03-051	325.78	325.9	325.84	8537.8	2	1	84.0025	626.331	267.65	259.34	0.544505	0.884926	-7.47417	1.45236	-0.204085	-9.65219	-5.0817		2017-01-06	13	84.5671	628.3	272.126	256.077	0.544505	0.884926	-7.47417	1.45236	-0.204085	-9.65219	-5.0817	2019-07-10	(outer ice)	83.4379	624.361	263.173	262.603
03-097	348.42	348.54	348.48	9402.8	2	1	83.2856	666.9	266.759	262.718	0.523262	0.942259	-8.3406	0.744398	-0.104264	-10.4336	-5.53474		2017-01-06	13	83.929	668.919	270.885	259.895	0.523262	0.942259	-8.3406	0.744398	-0.104264	-10.4336	-5.53474	2019-07-10	(outer ice)	82.6423	664.881	262.632	265.541
03-140	369.94	370.06	370	10184	2	1	85.409	690.518	269.16	267.739	0.54021	1.10874	-4.59281	3.06979	0.0283217	-6.75365	-3.41273		2017-01-06	13	86.1834	692.367	271.949	264.348	0.54021	1.10874	-4.59281	3.06979	0.0283217	-6.75365	-3.41273	2019-07-10	(outer ice)	84.6345	688.668	266.372	271.129
03-158	379.28	379.4	379.34	10525.9	2	1	83.2248	692.517	269.685	270.46	0.521855	1.21679	-8.41774	1.72892	0.173079	-10.5052	-4.53334		2016-11-08	11	85.0669	692.545	273.004	269.947	0.521855	1.21679	-8.41774	1.72892	0.173079	-10.5052	-4.53334	2019-07-11	(outer ice)	81.3827	692.489	266.366	270.974
12-091	1245	1245.12	1245.06	76829.9	2	1	86.6905	458.298	252.452	266.451	0.486302	1.01744	3.00259	3.19199	0.0448403	1.05739	-2.64363		2016-03-04	11	88.0982	453.617	247.813	268.028	0.490304	1.01977	3.24532	1.95037	0.0391636	1.28411	-3.93328	2016-05-12	(outer ice)	84.9687	465.46	255.85	258.827
12-113	1256	1256.12	1256.06	77962.7	2	1	86.52	483.292	234.551	260.707	0.486139	0.977019	-9.22827	-5.60952	0.00474114	-11.1728	-11.4432		2016-03-09	13	86.9279	479.887	232.847	258.246	0.48533	0.973352	-9.29641	-6.07928	0.00269169	-11.2377	-11.9032	2016-05-17	(outer ice)	85.9582	488.226	235.615	261.13
12-155	1277	1277.12	1277.06	80326.7	2	1	85.6399	528.168	241.55	255.365	0.491543	0.919845	-10.0389	1.13022	-0.0632409	-12.0051	-4.76829		2016-03-31	11	85.7777	524.916	238.946	256.263	0.491543	0.919845	-10.0389	1.13022	-0.0632409	-12.0051	-4.76829	2016-05-17	(outer ice)	85.502	531.42	244.154	254.468
13-123	1361	1361.12	1361.06	88874.3	2	1	83.4022	439.552	225.967	224.687	0.492227	1.3492	-13.3407	-3.26944	0.364748	-15.3096	-9.17616		2016-03-02	11	83.0156	438.383	225.832	224.654	0.492287	1.34524	-13.4425	-3.14193	0.360665	-15.4116	-9.04937	2016-05-13	(outer ice)	83.7887	440.722	226.102	224.72
14-003	1401	1401.12	1401.06	92851.7	2	1	83.4005	453.59	227.845	249.866	0.50307	1.56868	-13.826	-2.86831	0.562544	-15.8383	-8.90515		2016-02-04	8	83.2933	456.146	229.044	251.875	0.50307	1.56868	-13.826	-2.86831	0.562544	-15.8383	-8.90515	2016-02-04	5	83.5077	451.033	226.646	247.857
14-098	1448.47	1448.59	1448.53	97045.6	2	1	87.6536	455.425	250.846	265.416	0.496602	1.32968	-5.77463	1.0435	0.336472	-7.76104	-4.91573		2016-02-02	5	87.806	453.575	249.493	265.687								2016-02-02	8	87.5012	457.276	252.198	265.145	0.496602	1.32968	-5.77463	1.0435	0.336472	-7.76104	-4.91573
14-148	1473.5	1473.62	1473.56	99316.4	2	2	87.1042	494.286	245.467	265.309	0.507217	1.08165	-6.03411	0.837747	0.0672143	-8.06297	-5.24886		2016-02-05	8	86.5092	490.776	244.337	265.342	0.508973	1.08142	-6.05694	0.79894	0.0634733	-8.09283	-5.30874	2016-02-05	8	87.6992	497.795	246.598	265.277	0.505461	1.08188	-6.01127	0.876553	0.0709552	-8.03312	-5.18898
14-174	1486.5	1486.62	1486.56	100400	2	2	88.5991	518.385	242.864	259.417	0.499407	0.971334	-4.83211	1.77954	-0.0274792	-6.82973	-4.21334		2016-04-20	9	88.8392	523.38	242.572	257.053	0.496559	0.965947	-4.85276	1.56836	-0.0271716	-6.839	-4.39035	2016-04-20	9	88.3591	513.39	243.156	261.781	0.502254	0.976721	-4.81145	1.99072	-0.0277868	-6.82047	-4.03633
15-043	1521	1521.12	1521.06	103301	2	2	90.0807	549.662	244.566	269.361	0.495885	0.987347	-4.74131	2.37919	-0.0044222	-6.72485	-3.57143		2016-04-20	9	89.6579	548.973	244.955	270.843	0.485558	0.978075	-4.75031	2.50918	0.00695832	-6.69254	-3.31752	2016-04-20	9	90.5034	550.351	244.176	267.878	0.506211	0.996619	-4.73232	2.2492	-0.0158027	-6.75716	-3.82533
15-082	1540.5	1540.62	1540.56	105206	2	2	90.837	499.439	250.088	249.169	0.542767	0.961011	-3.44608	2.57863	-0.124523	-5.61714	-3.93457		2016-04-05	9	90.2042	501.061	250.187	247.191	0.552658	0.973942	-3.5336	2.70256	-0.131373	-5.74423	-3.92933	2019-07-16	9	91.4698	497.817	249.99	251.146	0.532876	0.94808	-3.35855	2.45471	-0.117673	-5.49005	-3.93981
15-116	1557.5	1557.62	1557.56	107226	2	1	91.0609	620.041	253.296	271.242	0.499695	1.0754	-3.35669	2.10897	0.076015	-5.35547	-3.88737		2016-02-02	5	91.5975	624.551	255.656	272.142								2016-02-02	8	90.5242	615.531	250.936	270.342	0.499695	1.0754	-3.35669	2.10897	0.076015	-5.35547	-3.88737
15-125	1562	1562.12	1562.06	107718	2	2	87.7416	561.24	253.904	285.526	0.516547	1.17841	-7.69803	0.320713	0.145315	-9.76422	-5.87785		2016-06-02	10	87.8921	560.276	255.249	286.042	0.517234	1.18376	-7.75509	0.322058	0.149295	-9.82403	-5.88475	2016-06-02	10	87.5912	562.204	252.559	285.01	0.515859	1.17305	-7.64097	0.319368	0.141336	-9.70441	-5.87094
15-146	1572.5	1572.62	1572.56	108831	2	2	87.0246	629.812	268.769	289.746	0.545267	1.51406	-6.94764	1.71117	0.423522	-9.12871	-4.83203		2016-02-09	8	87.3281	630.377	271.057	290.948	0.540527	1.51162	-6.78603	1.84302	0.43057	-8.94813	-4.6433	2016-02-09	11	86.7212	629.247	266.482	288.543	0.550007	1.51649	-7.10926	1.57932	0.416474	-9.30928	-5.02076
15-175	1587	1587.12	1587.06	110403	2	2	86.4197	467.558	249.674	241.7	0.533027	1.55442	-6.53434	1.07908	0.488367	-8.66645	-5.31724		2016-04-12	9	87.1741	464.676	248.046	241.588	0.534464	1.54365	-6.47217	1.13289	0.474719	-8.61002	-5.28068	2016-04-12	9	85.6653	470.441	251.302	241.812	0.53159	1.5652	-6.59651	1.02527	0.502016	-8.72287	-5.3538
16-020	1609.5	1609.62	1609.56	113451	2	2	83.8058	517.003	267.648	268.235	0.526402	1.67567	-10.8909	-0.276455	0.622865	-12.9965	-6.59327		2016-04-05	9	82.965	514.972	269.249	269.643	0.526858	1.67984	-10.8605	-0.194317	0.626121	-12.968	-6.51661	2016-04-05	9	84.6466	519.034	266.047	266.827	0.525945	1.6715	-10.9213	-0.358592	0.619609	-13.025	-6.66993
16-027	1613	1613.12	1613.06	113912	2	2	84.1218	502.59	259.596	263.2	0.520624	1.65971	-8.476	-0.304426	0.618464	-10.5585	-6.55192		2016-06-02	9	83.9402	505.192	259.321	263.761	0.517982	1.65255	-8.44598	-0.340039	0.616589	-10.5179	-6.55582	2016-06-02	9	84.3035	499.988	259.871	262.638	0.523267	1.66687	-8.50602	-0.268813	0.620339	-10.5991	-6.54802
16-036	1617.5	1617.62	1617.56	114521	2	2	84.5843	494.743	264.453	257.994	0.50523	1.66144	-8.4565	-0.272837	0.650978	-10.4774	-6.33559		2016-02-26	9	84.3644	491.321	262.127	257.637	0.501777	1.65655	-8.58066	-0.368452	0.652994	-10.5878	-6.38978	2016-02-26	9	84.8043	498.165	266.779	258.351	0.508682	1.66633	-8.33234	-0.177223	0.648963	-10.3671	-6.28141
16-083	1641	1641.12	1641.06	117721	1	1	84.9451	484.632	279.089	268.04	0.550943	1.70389	-8.61001	0.768861	0.602005	-10.8138	-5.84246		2016-06-16	10	84.9451	484.632	279.089	268.04	0.550943	1.70389	-8.61001	0.768861	0.602005	-10.8138	-5.84246
16-093	1646	1646.12	1646.06	118410	2	1	85.231	507.776	282.712	266.359	0.524686	1.61288	-7.52039	1.05526	0.563504	-9.61914	-5.24097		2016-02-03	5	85.1481	508.552	280.96	264.866								2016-02-03	8	85.3138	507	284.464	267.851	0.524686	1.61288	-7.52039	1.05526	0.563504	-9.61914	-5.24097
16-132	1665.5	1665.62	1665.56	120782	2	2	84.8986	564.527	293.879	273.415	0.527086	1.40774	-5.50541	1.34899	0.353568	-7.61376	-4.97604		2016-02-17	9	85.465	563.331	298.325	270.597	0.520736	1.39043	-5.54611	1.25185	0.348957	-7.62905	-4.99699	2016-02-17	9	84.3323	565.722	289.434	276.233	0.533436	1.42505	-5.46472	1.44613	0.35818	-7.59846	-4.9551
16-176	1687.5	1687.62	1687.56	123146	2	2	85.7201	576.746	291.133	281.526	0.523151	0.975824	-4.4358	1.49877	-0.0704784	-6.5284	-4.77904		2016-03-10	9	85.5621	576.141	289.586	282.667	0.522654	0.985736	-4.46391	1.55932	-0.0595726	-6.55452	-4.71252	2016-03-10	9	85.8782	577.351	292.681	280.385	0.523648	0.965912	-4.40769	1.43822	-0.0813843	-6.50228	-4.84555
17-025	1712.04	1712.15	1712.1	125363	2	1	86.0566	612.817	289.574	276.799	0.525338	0.734043	-4.44916	1.94379	-0.316633	-6.55051	-4.36027		2016-02-19	9	86.1862	612.701	288.467	277.867								2016-02-19	9	85.927	612.932	290.682	275.731	0.525338	0.734043	-4.44916	1.94379	-0.316633	-6.55051	-4.36027
17-025	1712.04	1712.15	1712.1	125363	2	1	86.0566	612.817	289.574	276.799	0.525338	0.734043	-4.44916	1.94379	-0.316633	-6.55051	-4.36027		2016-02-19	9	86.1862	612.701	288.467	277.867	0.525338	0.734043	-4.44916	1.94379	-0.316633	-6.55051	-4.36027	2017-01-17	(outer ice)	85.927	612.932	290.682	275.731
17-077	1738	1738.12	1738.06	127512	2	2	83.8176	620.924	288.096	275.317	0.516258	0.679294	-4.47105	1.98268	-0.353222	-6.53608	-4.21242		2016-03-09	9	83.2882	617.646	288.622	275.361	0.517137	0.683359	-4.43405	2.04614	-0.350915	-6.50259	-4.1595	2016-03-09	9	84.347	624.203	287.57	275.272	0.515379	0.675229	-4.50805	1.91922	-0.355529	-6.56957	-4.26533
17-135	1767	1767.12	1767.06	129914	2	1	85.5177	677.355	280.21	263.318	0.539098	1.32208	-6.42549	2.14663	0.24388	-8.58188	-4.32255		2016-02-03	5	85.1796	679.051	281.974	264.1								2016-02-03	8	85.8557	675.659	278.446	262.536	0.539098	1.32208	-6.42549	2.14663	0.24388	-8.58188	-4.32255
18-052	1825.5	1825.62	1825.56	134089	2	2	86.3095	454.597	248.845	254.965	0.497544	2.11488	-9.81015	-0.659487	1.11979	-11.8003	-6.63002		2016-03-03	9	86.3553	455.659	251.058	255.312	0.493816	2.11292	-9.84766	-0.743505	1.12529	-11.8229	-6.66929	2016-03-03	9	86.2636	453.534	246.631	254.618	0.501273	2.11684	-9.77264	-0.57547	1.1143	-11.7777	-6.59074
18-063	1831	1831.12	1831.06	134648	2	2	86.3004	489.843	235.346	271.752	0.499436	2.09352	-10.0004	-0.349269	1.09465	-11.9981	-6.3425		2016-03-30	9	86.0599	486.655	231.548	276.374	0.502797	2.09042	-9.99113	-0.394559	1.08483	-12.0023	-6.42813	2016-03-30	9	86.541	493.031	239.144	267.13	0.496075	2.09662	-10.0096	-0.303978	1.10447	-11.9939	-6.25687
18-074	1836.5	1836.62	1836.56	135233	2	2	87.3418	417.911	221.324	245.719	0.498264	2.03835	-8.59027	-0.708873	1.04183	-10.5833	-6.68804		2016-03-10	9	87.2263	419.869	222.23	245.813	0.491257	2.03025	-8.46934	-0.714948	1.04774	-10.4344	-6.61003	2016-03-10	9	87.4574	415.953	220.419	245.625	0.505271	2.04645	-8.71121	-0.702798	1.03591	-10.7323	-6.76605
18-084	1841.5	1841.62	1841.56	135922	2	2	86.3269	413.991	217.443	282.16	0.459666	1.95798	-9.15702	-0.845384	1.03864	-10.9957	-6.36137		2016-02-18	9	85.9521	412.137	215.144	282.424	0.463231	1.95893	-9.25661	-0.788355	1.03247	-11.1095	-6.34712	2016-02-18	12	86.7017	415.844	219.743	281.897	0.456101	1.95702	-9.05743	-0.902412	1.04482	-10.8818	-6.37562
18-106	1852.5	1852.62	1852.56	137681	2	2	88.4116	402.77	213.171	266.527	0.473599	1.96122	-8.35372	-0.173491	1.01402	-10.2481	-5.85668		2016-02-16	9	88.3841	402.063	210.949	267.047	0.468418	1.95925	-8.3227	-0.238451	1.02241	-10.1964	-5.85947	2016-02-16	9	88.4391	403.477	215.393	266.007	0.478779	1.96319	-8.38474	-0.108532	1.00563	-10.2999	-5.85388
18-118	1858.5	1858.62	1858.56	138647	2	2	88.3762	349.159	213.649	304.802	0.467359	1.87146	-6.3706	-0.325061	0.936737	-8.24004	-5.93337		2016-03-11	9	87.7404	348.44	218.1	307.354	0.467754	1.88262	-6.36445	-0.324437	0.947109	-8.23547	-5.93749	2016-03-11	9	89.012	349.878	209.198	302.25	0.466965	1.86029	-6.37675	-0.325686	0.926364	-8.2446	-5.92926
18-159	1879	1879.12	1879.06	142408	2	2	91.0043	399.611	202.235	278.821	0.463274	1.56124	-3.90941	1.02146	0.634696	-5.76251	-4.53783		2016-02-18	9	90.9408	400.385	202.666	281.314	0.459704	1.56381	-3.92959	0.985143	0.644398	-5.76841	-4.53131	2016-02-18	12	91.0678	398.837	201.804	276.327	0.466843	1.55868	-3.88923	1.05777	0.624995	-5.7566	-4.54434
18-190	1894.5	1894.62	1894.56	145155	2	2	91.1805	398.201	217.073	241.221	0.481247	1.52773	-3.03937	1.20472	0.565233	-4.96436	-4.57024		2016-03-03	9	90.4911	399.459	219.154	241.823	0.479013	1.52259	-3.05847	1.22035	0.564562	-4.97452	-4.52781	2016-03-03	9	91.8699	396.943	214.993	240.62	0.483481	1.53287	-3.02028	1.1891	0.565905	-4.9542	-4.61268
19-004	1901.5	1901.62	1901.56	146463	2	2	92.2636	464.704	214.133	265.275	0.476237	1.51019	-3.76321	1.07938	0.557711	-5.66816	-4.63546		2016-03-11	9	91.2905	467.167	211.43	265.614	0.476594	1.51789	-3.77282	1.05899	0.564697	-5.67919	-4.66013	2016-03-11	9	93.2368	462.24	216.837	264.935	0.47588	1.50249	-3.7536	1.09977	0.550725	-5.65712	-4.61079
19-038	1918.5	1918.59	1918.55	150468	1	1	90.7448	422.881	212.635	280.068	0.484514	1.69531	-6.16389	0.89354	0.726286	-8.10195	-4.92063		2016-06-10	9	90.7448	422.881	212.635	280.068	0.484514	1.69531	-6.16389	0.89354	0.726286	-8.10195	-4.92063
Surface removal ress than 8mm (used for Fig. 12, Fig. 13)
Dome Fuji Sample ID	top (m)	bottom (m)	center (m)	Gas age at center depth (DFO-2006)	Extraction date	Surface removal thickness (mm)	15N (‰)	18O (‰)	O2/N2 (‰)	ArN2 (‰)	18O grav.corr. (‰)	O2N2 grav.corr (‰)	ArN2 grav.corr. (‰)	Extraction date	Surface removal thickness (mm)	15N (‰)	18O (‰)	O2/N2 (‰)	ArN2 (‰)	18O grav.corr. (‰)	O2N2 grav.corr (‰)	ArN2 grav.corr. (‰)
14-003	1401	1401.12	1401.06	8215.2	2016-02-04	5	0.511827	1.57518	-14.0389	-2.46954	0.55153	-16.0862	-8.61147
14-098	1448.47	1448.59	1448.53	8537.8	2016-02-02	5	0.507355	1.35287	-6.74496	1.24792	0.338159	-8.77438	-4.84034
15-116	1557.5	1557.62	1557.56	9402.8	2016-02-02	5	0.53166	1.13562	-3.42328	2.37666	0.0723034	-5.54992	-4.00326
16-093	1646	1646.12	1646.06	10184	2016-02-03	5	0.518429	1.59267	-7.84424	0.881196	0.555817	-9.91795	-5.33995
17-135	1767	1767.12	1767.06	10525.9	2016-02-03	5	0.536973	1.33109	-6.98005	1.9346	0.257142	-9.12794	-4.50908
03-036	317.9	318.02	317.96	76829.9	2019-07-10	(outer ice)	0.523916	0.89044	-14.5992	-0.745736	-0.157392	-16.6948	-7.03273
03-051	325.78	325.9	325.84	77962.7	2019-07-10	(outer ice)	0.533501	0.930782	-14.5041	-0.55715	-0.136219	-16.6381	-6.95916
03-097	348.42	348.54	348.48	80326.7	2019-07-10	(outer ice)	0.531169	1.04258	-17.8876	-1.60228	-0.0197592	-20.0123	-7.97631
03-140	369.94	370.06	370	88874.3	2019-07-10	(outer ice)	0.542059	1.19142	-13.2165	0.848749	0.107299	-15.3847	-5.65596
03-158	379.28	379.4	379.34	92851.7	2019-07-11	(outer ice)	0.532797	1.34416	-20.4232	-1.17931	0.278569	-22.5544	-7.57287
12-091	1245	1245.12	1245.06	97045.6	2016-05-12	(outer ice)	0.490013	1.12042	-9.50563	0.185453	0.140398	-11.4657	-5.69471
12-113	1256	1256.12	1256.06	107226	2016-05-17	(outer ice)	0.496787	1.05175	-16.0125	-2.80313	0.0581788	-17.9996	-8.76457
12-155	1277	1277.12	1277.06	117721	2016-05-17	(outer ice)	0.497354	1.0618	-22.556	-6.59389	0.0670926	-24.5454	-12.5621
13-123	1361	1361.12	1361.06	118410	2016-05-13	(outer ice)	0.500521	1.4716	-25.4871	-2.50964	0.470558	-27.4891	-8.51589
16-083	1641	1641.12	1641.06	125363	2016-08-03	(outer ice)	0.522161	1.71902	-17.0883	-1.08358	0.674695	-19.1769	-7.34951
17-025	1712.04	1712.15	1712.1	129914	2017-01-17	(outer ice)	0.512903	0.805908	-14.8285	-0.82668	-0.219898	-16.8801	-6.98152	2017-01-17	(outer ice)	0.517686	0.813298	-13.9183	-0.74474	-0.222075	-15.9891	-6.95698
19-038	1918.5	1918.59	1918.55	150468	2016-08-03	(outer ice)	0.482374	1.83489	-21.1754	-2.27861	0.87014	-23.1049	-8.06709

## Sheet: NEEM
NEEM ice core gas data for last 2000 yr (used for Fig. 9, Fig. 10, Fig. A1)
CORRESPONDENCE TO: Ikumi Oyabu, National Institute of Polar Research (oyabu.ikumi@nipr.ac.jp)
Please cite the original reference when using this data:
Original reference: Oyabu et al. New technique for high-precision, simultaneous measurements of CH4, N2O and CO2 concentrations, isotopic and elemental ratios of N2, O2 and Ar, and total air content in ice cores by wet extraction
Reference for gas age: Rasmussen, S. et al. (2013). A first chronology for the North Greenland Eemian Ice Drilling (NEEM) ice core. Climate of the Past, 9(6), 2713–2730. http://doi.org/10.5194/cp-9-2713-2013
NEEM core, CH4, CO2 and N2O are gravitationally corrected
							Mean values across all reps											First measurements											Second measurements (if applicable)
NEEM Sample ID	top (m)	bottom (m)	center (m)	Gas age at center depth (GICC05)	No. of meas. for GHGs	No. of meas. for isotopes	CH4 grav.corr. (ppb)	CO2 grav.corr. (ppm)	N2O grav.corr. (ppb)	15N (‰)	18O (‰)	O2/N2 (‰)	ArN2 (‰)	18O grav.corr. (‰)	O2N2 grav.corr (‰)	ArN2 grav.corr. (‰)		Extraction date	CH4 grav.corr. (ppb)	CO2 grav.corr. (ppm)	N2O grav.corr. (ppb)	15N (‰)	18O (‰)	O2/N2 (‰)	ArN2 (‰)	18O grav.corr (‰)	O2N2 grav.corr. (‰)	ArN2 grav.corr. (‰)	Extraction date	CH4 grav.corr. (ppb)	CO2 grav.corr. (ppm)	N2O grav.corr. (ppb)	15N (‰)	18O (‰)	O2/N2 (‰)	ArN2 (‰)	18O grav.corr (‰)	O2N2 grav.corr. (‰)	ArN2 grav.corr. (‰)
205	112.6	112.675	112.637	1782.61	1	1	779.354	298.359	271.195	0.308047	0.618811	-4.87717	0.332746	0.00271639	-6.10936	-3.36382		2012-08-02	779.354	298.359	271.195	0.308047	0.618811	-4.87717	0.332746	0.00271639	-6.10936	-3.36382
205	112.675	112.75	112.713	1782.2	1	1	769.452	291.214	271.461	0.291394	0.607286	-6.32194	-0.629456	0.0244978	-7.48752	-4.12618		2012-08-02	769.452	291.214	271.461	0.291394	0.607286	-6.32194	-0.629456	0.0244978	-7.48752	-4.12618
230	126.3	126.4	126.35	1717.82	1	1	732.096	293.656	269.007	0.297303	0.591464	-3.48661	0.914188	-0.00314142	-4.67582	-2.65344		2012-08-02	732.096	293.656	269.007	0.297303	0.591464	-3.48661	0.914188	-0.00314142	-4.67582	-2.65344
230	126.4	126.5	126.45	1717.27	1	1	728.265	287.063	268.908	0.298148	0.598793	-5.54173	-0.539341	0.00249663	-6.73432	-4.11712		2012-08-02	728.265	287.063	268.908	0.298148	0.598793	-5.54173	-0.539341	0.00249663	-6.73432	-4.11712
254	139.48	139.55	139.515	1656.67	2	2	732.811	301.975	268.591	0.294804	0.594419	-4.6903	-0.270281	0.0048121	-5.86952	-3.80792		2012-11-02	735.705	295.337	268.149	0.298219	0.593751	-4.21618	0.0229194	-0.00268735	-5.40906	-3.55571	2012-11-02	729.917	308.613	269.032	0.291388	0.595087	-5.16442	-0.563481	0.0123115	-6.32997	-4.06014
254	139.55	139.7	139.625	1656.27	2	2	737.314	290.623	267.033	0.300891	0.596698	-6.43179	-1.39143	-0.00508415	-7.63536	-5.00213		2012-08-10	738.188	290.894	267.198	0.304831	0.596057	-5.61765	-1.00397	-0.0136044	-6.83697	-4.66194	2012-08-10	736.441	290.352	266.867	0.296952	0.59734	-7.24593	-1.77889	0.00343611	-8.43374	-5.34231
278	152.6	152.65	152.625	1595	1	1	721.366	302.731	266.99	0.291954	0.567788	-0.62624	1.62064	-0.0161204	-1.79406	-1.88281		2014-06-11	721.366	302.731	266.99	0.291954	0.567788	-0.62624	1.62064	-0.0161204	-1.79406	-1.88281
278	152.65	152.7	152.675	1594.82	1	1	723.477	306.206	271.461	0.291338	0.589567	-3.48028	0.0429853	0.00689146	-4.64563	-3.45307		2014-06-11	723.477	306.206	271.461	0.291338	0.589567	-3.48028	0.0429853	0.00689146	-4.64563	-3.45307
278	152.7	152.9	152.8	1594.36	2	2	726.46	287.584	269.323	0.311132	0.61129	-4.21288	-0.0122371	-0.010975	-5.45741	-3.74583		2012-08-16	727.678	288.67	271.619	0.310243	0.608163	-3.36182	0.629319	-0.0123233	-4.60279	-3.0936	2012-08-16	725.242	286.498	267.027	0.312021	0.614416	-5.06394	-0.653794	-0.00962666	-6.31202	-4.39805
301	163.3	165.4	164.35	1537.55	1	1	764.738	310.501	268.865	0.258413	0.618488	-5.4527	-0.767697	0.101662	-6.48635	-3.86865		2012-11-01	764.738	310.501	268.865	0.258413	0.618488	-5.4527	-0.767697	0.101662	-6.48635	-3.86865
301	165.4	165.55	165.475	1532.41	2	2	761.062	306.263	272.595	0.303068	0.611029	-3.88256	-0.491387	0.00489308	-5.09483	-4.12821		2012-08-08	766.165	307.809	276.401	0.301939	0.614184	-4.22609	-0.517588	0.0103063	-5.43384	-4.14086	2012-08-08	755.959	304.717	268.789	0.304197	0.607875	-3.53903	-0.465187	-0.000520119	-4.75582	-4.11556
324	178.03	178.2	178.115	1472.46	1	1	720.987	291.326	268.258	0.293453	0.605202	-6.37747	-0.771777	0.0182954	-7.55129	-4.29322		2012-08-22	721.461	294.064	269.072	0.291961	0.601335	-5.6954	-0.484202	0.0174127	-6.86324	-3.98773	2012-08-22	720.513	288.589	267.444	0.294945	0.609069	-7.05955	-1.05935	0.0191782	-8.23933	-4.5987
348	191.1	191.15	191.125	1407.5	1	1	709.239	313.458	272.889	0.301797	0.592858	-2.54895	0.487279	-0.0107363	-3.75614	-3.13428		2014-06-12	709.239	313.458	272.889	0.301797	0.592858	-2.54895	0.487279	-0.0107363	-3.75614	-3.13428
348	191.15	191.2	191.175	1407.23	1	1	711.13	307.48	269.532	0.301052	0.584154	-0.647919	1.31849	-0.01795	-1.85213	-2.29414		2014-06-11	711.13	307.48	269.532	0.301052	0.584154	-0.647919	1.31849	-0.01795	-1.85213	-2.29414
348	191.2	191.4	191.3	1406.55	2	2	713.484	294.519	266.118	0.312963	0.627909	-7.73137	-1.93765	0.00198406	-8.98322	-5.6932		2012-08-08	711.675	295.794	266.543	0.316231	0.629598	-7.60435	-1.70837	-0.00286302	-8.86927	-5.50313	2012-08-08	715.293	293.244	265.693	0.309695	0.62622	-7.85839	-2.16692	0.00683114	-9.09717	-5.88326
372	204.45	204.6	204.525	1339.41	2	2	719.265	293.461	266.04	0.282976	0.591507	-8.15128	-1.30795	0.0255555	-9.28319	-4.70366		2012-08-10	719.877	293.922	265.474	0.287729	0.598735	-8.27703	-1.27961	0.0232764	-9.42795	-4.73236	2012-08-10	718.652	293.001	266.606	0.278223	0.58428	-8.02553	-1.33629	0.0278345	-9.13843	-4.67497
395	217.05	217.25	217.15	1278.55	1	2	730.459	298.983	271.785	0.304527	0.628434	-5.38406	-0.139649	0.0193804	-6.60216	-3.79397		2012-08-16	730.459	298.983	271.785	0.304527	0.628434	-5.38406	-0.139649	0.0193804	-6.60216	-3.79397	2012-08-16				0.306252	0.611175	-3.48943	1.14297	-0.0013289	-4.71444	-2.53206
418	229.7	229.9	229.8	1214.55	2	1	727.43	303.796	268.02	0.311618	0.628671	-5.919	-1.45689	0.00543385	-7.16547	-5.19631		2012-08-22	729.75	303.949	265.192								2012-08-22	725.111	303.643	270.848	0.311618	0.628671	-5.97207	-0.474822	0.00543385	-7.21854	-4.21424
439	241.3	241.45	241.375	1154.41	2	2	738.424	322.526	272.331	0.310156	0.627359	-4.3622	0.0252637	0.00704611	-5.60283	-3.69661		2012-08-28	741.063	328.948	272.872	0.306082	0.632579	-4.53171	-0.0136052	0.0204154	-5.75604	-3.68659	2012-08-28	735.784	316.105	271.789	0.314231	0.622139	-4.19269	0.0641325	-0.00632321	-5.44961	-3.70664
464	254.94	254.99	254.965	1084.28	1	1	726.657	314.907	268.93	0.269821	0.581808	-7.08713	-1.62008	0.042166	-8.16641	-4.85794		2014-06-19	726.657	314.907	268.93	0.269821	0.581808	-7.08713	-1.62008	0.042166	-8.16641	-4.85794
464	254.99	255.04	255.015	1084.01	1	1	732.746	305.334	267.211	0.259506	0.574843	-8.24928	-2.05503	0.0558314	-9.28731	-5.16911		2014-06-18	732.746	305.334	267.211	0.259506	0.574843	-8.24928	-2.05503	0.0558314	-9.28731	-5.16911
464	255.04	255.2	255.12	1083.44	2	2	723.403	300.175	269.682	0.314221	0.622322	-4.39902	0.0627821	-0.00612022	-5.6559	-3.70787		2012-09-04	723.847	299.863	272.235	0.317937	0.633085	-5.18339	-0.185637	-0.00278947	-6.45514	-4.00088	2012-09-04	722.96	300.488	267.13	0.310505	0.611559	-3.61464	0.311201	-0.00945098	-4.85666	-3.41486
485	266.6	266.75	266.675	1022.41	2	2	732.454	306.859	269.423	0.315141	0.650689	-6.2277	-0.871009	0.0204075	-7.48826	-4.6527		2012-09-06	734.63	310.468	271.302	0.311274	0.650532	-6.72294	-0.94347	0.0279845	-7.96804	-4.67875	2012-09-06	730.278	303.251	267.544	0.319008	0.650847	-5.73246	-0.798548	0.0128305	-7.00849	-4.62665
508	279	279.09	279.045	961.291	1	1	717.608	309.16	269.447	0.297804	0.596707	-4.08951	-0.193845	0.00109911	-5.28072	-3.76749		2020-03-06	717.608	309.16	269.447	0.297804	0.596707	-4.08951	-0.193845	0.00109911	-5.28072	-3.76749
508	279.09	279.18	279.135	960.964	1	1	724.846	307.16	269.979	0.29497	0.571877	-0.537366	1.39013	-0.0180629	-1.71725	-2.14951		2020-03-06	724.846	307.16	269.979	0.29497	0.571877	-0.537366	1.39013	-0.0180629	-1.71725	-2.14951
508	279.18	279.35	279.265	960.491	2	2	726.179	333.673	272.116	0.302119	0.636519	-6.97277	-1.10603	0.0322813	-8.18125	-4.73146		2012-09-21	729.501	344.602	273.634	0.305763	0.638138	-6.68948	-0.863403	0.026612	-7.91253	-4.53256	2012-09-21	722.858	322.745	270.599	0.298474	0.634899	-7.25607	-1.34866	0.0379505	-8.44997	-4.93035
529	290.8	290.95	290.875	901.273	2	2	694.128	297.238	269.556	0.311278	0.636778	-5.37476	-0.606834	0.0142218	-6.61987	-4.34217		2012-09-04	695.479	299.197	269.224	0.312152	0.643178	-6.31045	-0.89366	0.0188745	-7.55905	-4.63948	2012-09-04	692.777	295.278	269.888	0.310404	0.630378	-4.43906	-0.320008	0.00956915	-5.68068	-4.04486
551	302.85	303.05	302.95	838.364	2	2	683.031	308.589	266.201	0.292792	0.601198	-2.539	0.602623	0.0156133	-3.71017	-2.91088		2012-09-21	681.633	304.596	264.963	0.29258	0.601167	-2.09066	0.709086	0.0160071	-3.26098	-2.80187	2012-09-21	684.428	312.582	267.439	0.293004	0.601228	-2.98734	0.49616	0.0152195	-4.15936	-3.01989
573	314.95	315.15	315.05	776.545	2	2	670.623	306.397	264.158	0.30078	0.635069	-8.53438	-2.42369	0.0335091	-9.7375	-6.03305		2012-08-28	670.943	305.132	266.354	0.303071	0.639507	-8.87574	-2.5552	0.0333645	-10.088	-6.19206	2012-08-28	670.303	307.661	261.961	0.298488	0.630631	-8.19302	-2.29217	0.0336536	-9.38697	-5.87403
594	326.55	326.7	326.625	716.409	2	2	696.352	327.926	265.709	0.301411	0.663804	-7.23877	-1.77852	0.0609819	-8.44441	-5.39545		2012-09-06	698.124	319.976	265.311	0.308317	0.677702	-8.0749	-2.22092	0.0610678	-9.30817	-5.92073	2012-09-06	694.579	335.876	266.108	0.294505	0.649907	-6.40263	-1.33612	0.0608961	-7.58066	-4.87018
615	338	338.05	338.025	657.227	1	0	686.601	316.306	270.178									2014-06-20	686.601	316.306	270.178
615	338.05	338.1	338.075	656.955	1	1	682.412	293.655	259.243	0.277712	0.588433	-6.7781	-1.46868	0.0330088	-7.88895	-4.80122		2014-06-18	682.412	293.655	259.243	0.277712	0.588433	-6.7781	-1.46868	0.0330088	-7.88895	-4.80122
615	338.1	338.25	338.175	656.409	2	2	683.98	303.07	266.504	0.31243	0.658087	-5.95656	-0.161221	0.0332278	-7.20628	-3.91038		2012-09-19	685.414	305.621	266.444	0.316669	0.661818	-6.06353	-0.0241375	0.0284801	-7.33021	-3.82417	2012-09-19	682.547	300.518	266.563	0.30819	0.654356	-5.84959	-0.298305	0.0379754	-7.08235	-3.99659
636	349.65	349.8	349.725	595.409	2	2	696.043	296.547	263.273	0.302431	0.631171	-6.18013	-0.358282	0.0263091	-7.38986	-3.98745		2012-09-19	698.001	299.404	264.888	0.304015	0.639829	-6.67984	-0.347713	0.0317995	-7.8959	-3.99589	2012-09-19	694.085	293.69	261.658	0.300847	0.622513	-5.68043	-0.368851	0.0208187	-6.88382	-3.97902
657	361.05	361.12	361.085	533.445	1	0	686.706	306.097	271.664									2016-04-26	686.706	306.097	271.664
657	361.12	361.2	361.16	533.036	1	1	734.762	332.941	267.563	0.277103	0.586234	-6.05279	-1.45807	0.0320282	-7.16121	-4.78331		2016-05-10	734.762	332.941	267.563	0.277103	0.586234	-6.05279	-1.45807	0.0320282	-7.16121	-4.78331
657	361.2	361.35	361.275	532.409	2	2	739.274	341.25	268.872	0.272867	0.604804	-9.05638	-2.0549	0.0590686	-10.1478	-5.3293		2012-09-26	737.143	340.965	268.638	0.272867	0.604804	-9.05638	-2.0549	0.0590686	-10.1478	-5.3293	2012-10-11	741.404	341.534	269.106	0.291749	0.640122	-7.99855	-1.45436	0.056623	-9.16554	-4.95535
679	373.3	373.45	373.375	465.409	2	2	677.824	317.412	269.664	0.288681	0.628488	-3.60234	0.347532	0.0511267	-4.75707	-3.11664		2012-09-28	680.325	320.342	271.846	0.288519	0.626516	-2.99692	0.85751	0.0494771	-4.151	-2.60472	2012-10-10	675.323	314.482	267.483	0.288842	0.63046	-4.20776	-0.162447	0.0527763	-5.36313	-3.62855
699	384.3	384.45	384.375	405.409	2	2	660.37	293.3	267.336	0.318175	0.645732	-3.804	0.866395	0.00938128	-5.0767	-2.95171		2012-09-26	657.709	294.037	264.033	0.315534	0.641552	-3.76354	0.893432	0.0104847	-5.02567	-2.89297	2012-10-02	663.031	292.563	270.639	0.320816	0.649911	-3.84446	0.839359	0.00827787	-5.12772	-3.01044
719	395.05	395.2	395.125	342.773	2	2	680.35	298.139	272.96	0.306607	0.634861	-4.8955	-0.442727	0.0216479	-6.12193	-4.12201		2012-10-02	682.86	298.134	278.378	0.312594	0.63692	-5.16716	-0.371037	0.0117312	-6.41754	-4.12217	2012-10-10	677.84	298.143	267.542	0.300619	0.632802	-4.62384	-0.514417	0.0315646	-5.82632	-4.12184
740	406.85	407	406.925	277.409	2	2	687.537	301.31	271.2	0.303446	0.631122	-6.75933	-0.985174	0.024231	-7.97311	-4.62652		2012-09-28	688.714	297.933	274.692	0.305435	0.633236	-7.4754	-1.57763	0.0223664	-8.69714	-5.24285	2012-10-02	686.36	304.686	267.708	0.301456	0.629009	-6.04326	-0.392718	0.0260956	-7.24909	-4.0102
760	417.6	417.67	417.635	218.991	1	0	680.226	307.672	271.483									2016-04-26	680.226	307.672	271.483
760	417.67	417.76	417.715	218.555	1	1	685.785	313.43	269.068	0.296772	0.640648	-4.90635	-0.127938	0.0471036	-6.09344	-3.6892		2016-05-10	685.785	313.43	269.068	0.296772	0.640648	-4.90635	-0.127938	0.0471036	-6.09344	-3.6892
760	417.85	418	417.925	217.409	2	2	703.02	311.643	268.892	0.295476	0.634355	-7.92028	-1.30628	0.0434023	-9.10219	-4.852		2012-09-26	702.263	311.974	271.526	0.295476	0.634355	-7.92028	-1.30628	0.0434023	-9.10219	-4.852	2012-10-11	703.777	311.312	266.258	0.309049	0.648068	-6.94963	-1.03017	0.0299699	-8.18583	-4.73876
780	428.85	429	428.925	154.273	2	2	678.83	308.368	269.115	0.29376	0.622647	-5.8009	-0.866945	0.0351284	-6.97594	-4.39206		2012-09-28	680.234	313.226	269.387	0.301028	0.6303	-5.02253	-0.245296	0.0282443	-6.22664	-3.85763	2012-10-10	677.425	303.51	268.843	0.286491	0.614995	-6.57928	-1.48859	0.0420125	-7.72524	-4.92649
798	438.75	438.9	438.825	100.409	2	1	672.731	304.349	268.802	0.289817	0.621038	-7.45796	-1.38509	0.0414037	-8.61723	-4.8629		2012-09-26	672.731	304.349	268.802	0.289817	0.621038	-7.45796	-1.38509	0.0414037	-8.61723	-4.8629	2012-10-11	675.623	305.822	266.461
817	448.95	449.1	449.025	45.7727	2	2	665.279	308.569	271.952	0.311501	0.665772	-8.5802	-2.22546	0.04277	-9.8262	-5.96348		2012-09-28	665.478	308.008	273.993	0.319919	0.67127	-8.65217	-2.5216	0.0314318	-9.93184	-6.36064	2012-10-11	665.079	309.13	269.911	0.303083	0.660274	-8.50822	-1.92932	0.0541082	-9.72056	-5.56632
